# Supplementary material
Source: PubMed Central journal article supplement (PMC3090235)

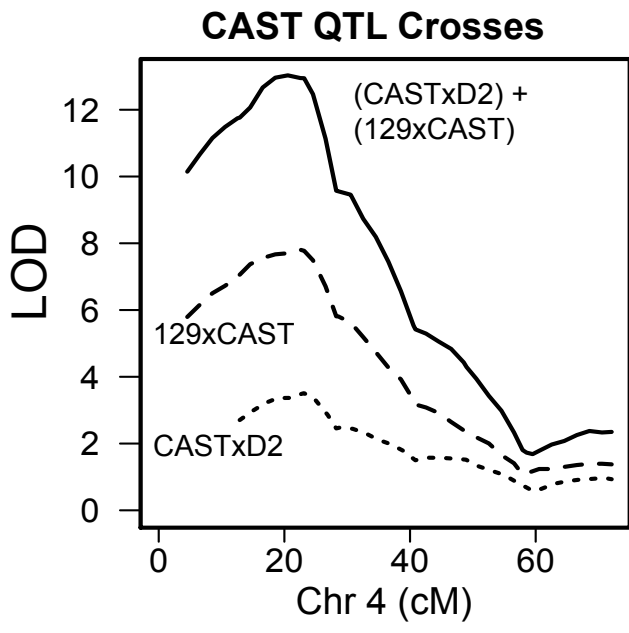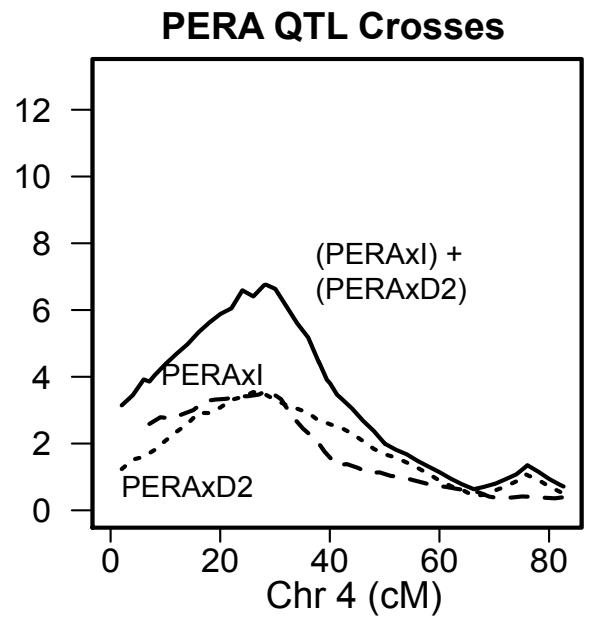

Figure 1

Supplement: supp_M009175_jlr.M009175-2.pdf [file supp_M009175_jlr.M009175-2.pdf]
